# Supplementary material for: A study on the acidity of sulfated CuO layers grown by surface reconstruction of Cu2O with specific exposed facets
Source: Royal Society of Chemistry journal article supplement (doi:10.1039/d0cy00892c), 2020-01-01
Supplement: d0cy00892c1.pdf [file d0cy00892c1.pdf]

## Supporting information

### The study on acidity of sulfated CuO layers grown by surface reconstruction of Cu<sub>2</sub>O exposed with specific facets

Yanan Wu <sup>a</sup>, Xin Chen <sup>a</sup>, Daofeng Huang <sup>a</sup>, Li Zhang <sup>a</sup>, Yuanhang Ren <sup>a</sup>, Gangfeng Tang <sup>a</sup>, Xueying Chen, Bin Yue <sup>a,\*</sup>, Heyong He <sup>a,\*</sup>

<sup>a</sup> *Department of Chemistry and Shanghai Key Laboratory of Molecular Catalysis and Innovative Materials, Collaborative Innovation Center of Chemistry for Energy Materials, Fudan University, Shanghai 200433, P. R. China*

\*Corresponding authors. Tel: +86-21-31243916; E-mail addresses: yuebin@fudan.edu.cn, heyonghe@fudan.edu.cn.

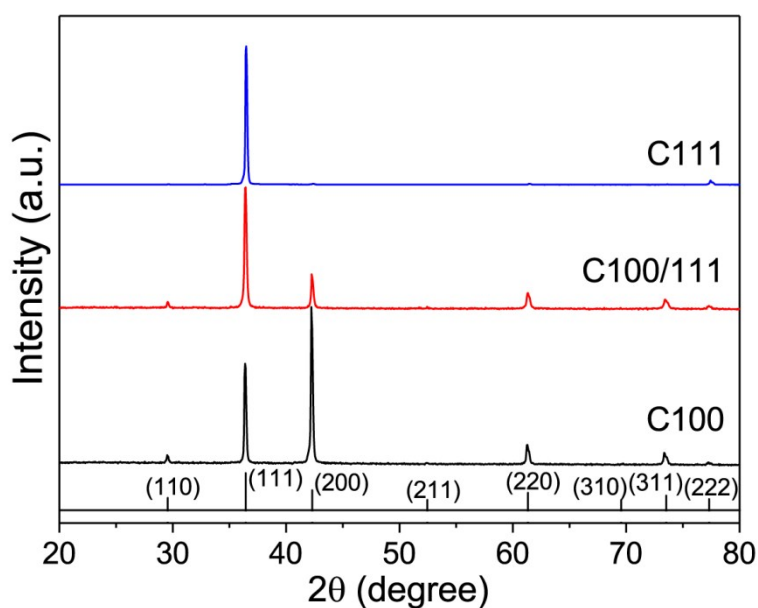

Fig S1 XRD patterns of pristine Cu<sub>2</sub>O samples.

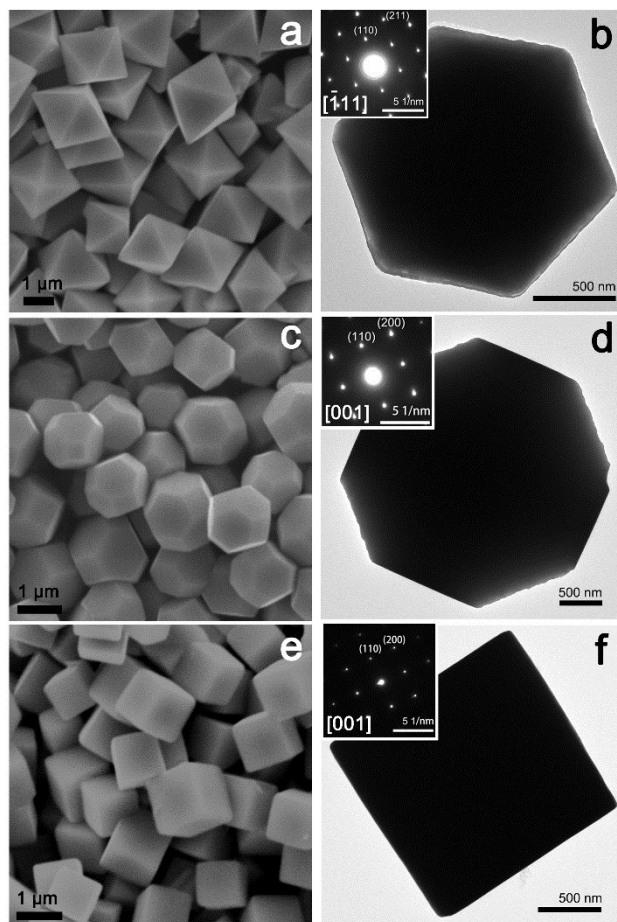

Fig S2 SEM and TEM images of (a, b) C111, (c, d) C100/111, (e, f) C100. The insets of b, d, f are corresponding SAED patterns.

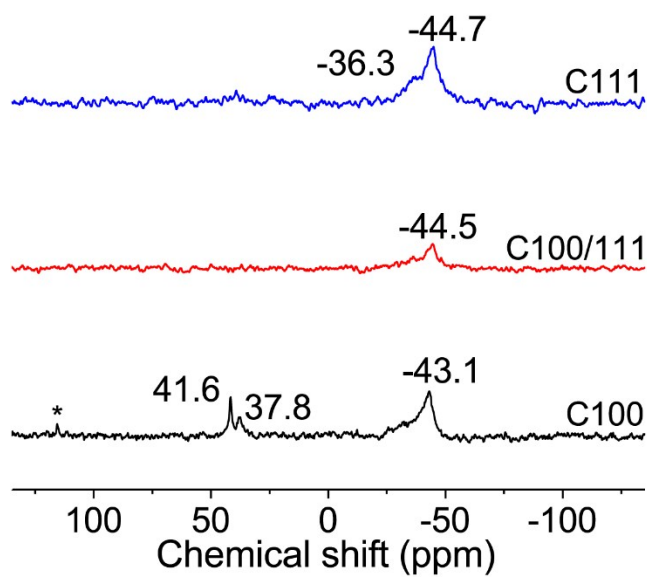

Fig S3  $^{31}\text{P}$  MAS NMR spectra of pristine  $\text{Cu}_2\text{O}$  samples adsorbed with TMP.

Table S1 Acid properties of pristine Cu<sub>2</sub>O characterized by <sup>31</sup>P MAS NMR

| Samples  | Brønsted acid density<br>( $\mu\text{mol}\cdot\text{g}^{-1}$ ) | Lewis acid density<br>( $\mu\text{mol}\cdot\text{g}^{-1}$ ) | Total acid density<br>( $\mu\text{mol}\cdot\text{g}^{-1}$ ) |
|----------|----------------------------------------------------------------|-------------------------------------------------------------|-------------------------------------------------------------|
| C111     | Not observed                                                   | 11.4                                                        | 11.4                                                        |
| C100/111 | Not observed                                                   | 7.30                                                        | 7.30                                                        |
| C100     | Not observed                                                   | 14.7                                                        | 14.7                                                        |

Table S2 Chemical shift of all peaks located between -25 to -50 ppm in <sup>31</sup>P MAS NMR spectra of SCO samples after deconvolution

|                   | SCO111<br>(ppm) | SCO100/111<br>(ppm) | SCO100<br>(ppm) |
|-------------------|-----------------|---------------------|-----------------|
| Type A Lewis acid | -25.0           | -25.2               | -26.1           |
|                   | -29.9           | -30.1               | -31.0           |
|                   | -34.8           | -35.0               | -35.9           |
|                   | -39.7           | -39.9               | -40.8           |
| Type B Lewis acid | -29.9           | -30.2               | -30.8           |
|                   | -34.9           | -35.2               | -35.8           |
|                   | -39.9           | -40.2               | -40.8           |
|                   | -44.9           | -45.2               | -45.8           |
| Type C Lewis acid | -31.8           | -32.2               | -32.3           |
|                   | -36.6           | -37.0               | -37.1           |
|                   | -41.4           | -41.8               | -41.9           |
|                   | -46.2           | -46.6               | -46.7           |

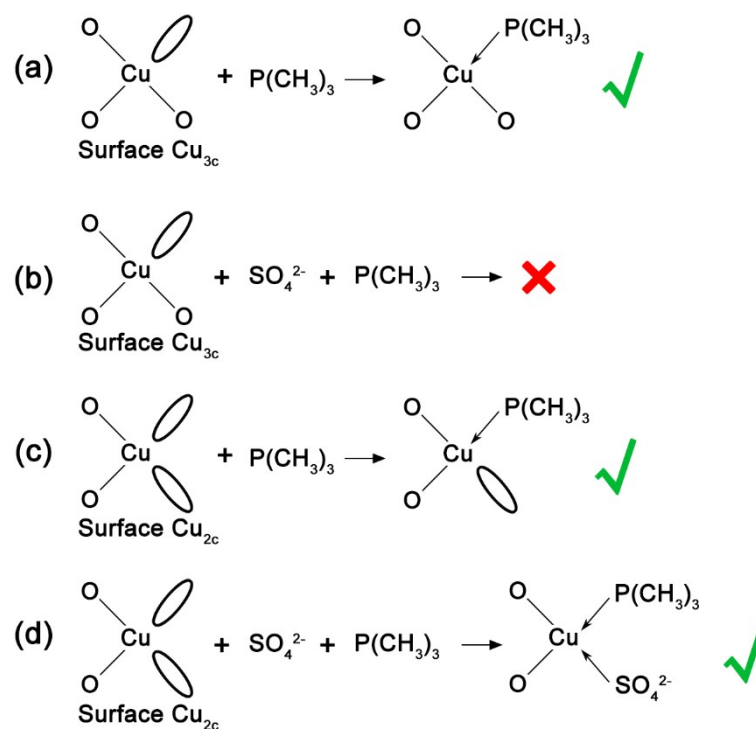

Fig. S4 Analysis of Lewis acid sites on SCO samples.

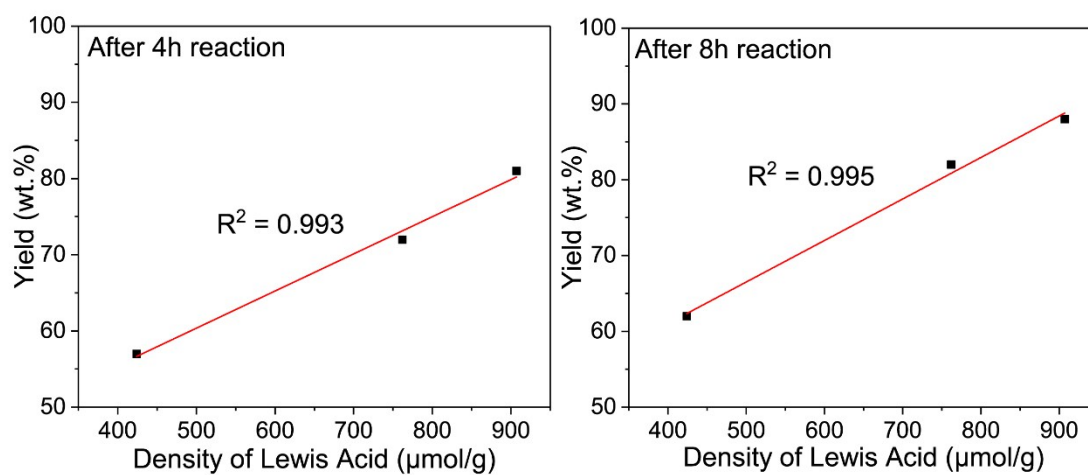

Fig. S5 Correlation between total density of Type B and C Lewis acid and yield of coumarin on SCO samples.
